# Supplementary material
Source: Springer Nature journal article supplement (https://www.springermedizin.de/resource/supplementary/12905_2006_89_MOESM2_ESM.pdf/9519080)

## Website Credibility

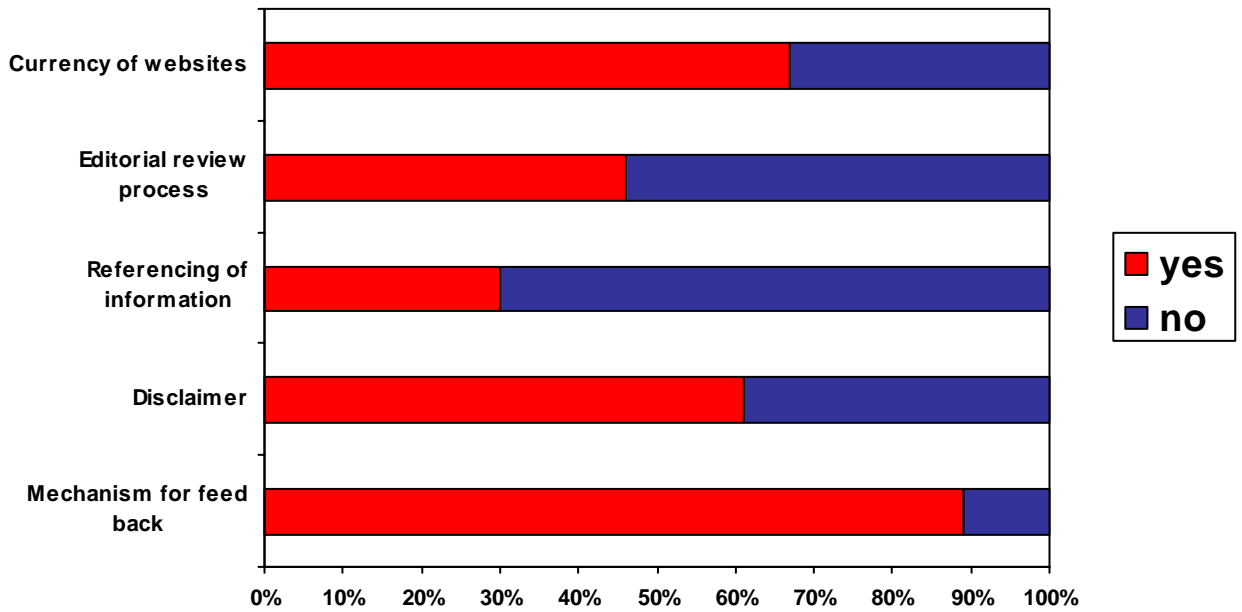

## Website Accuracy

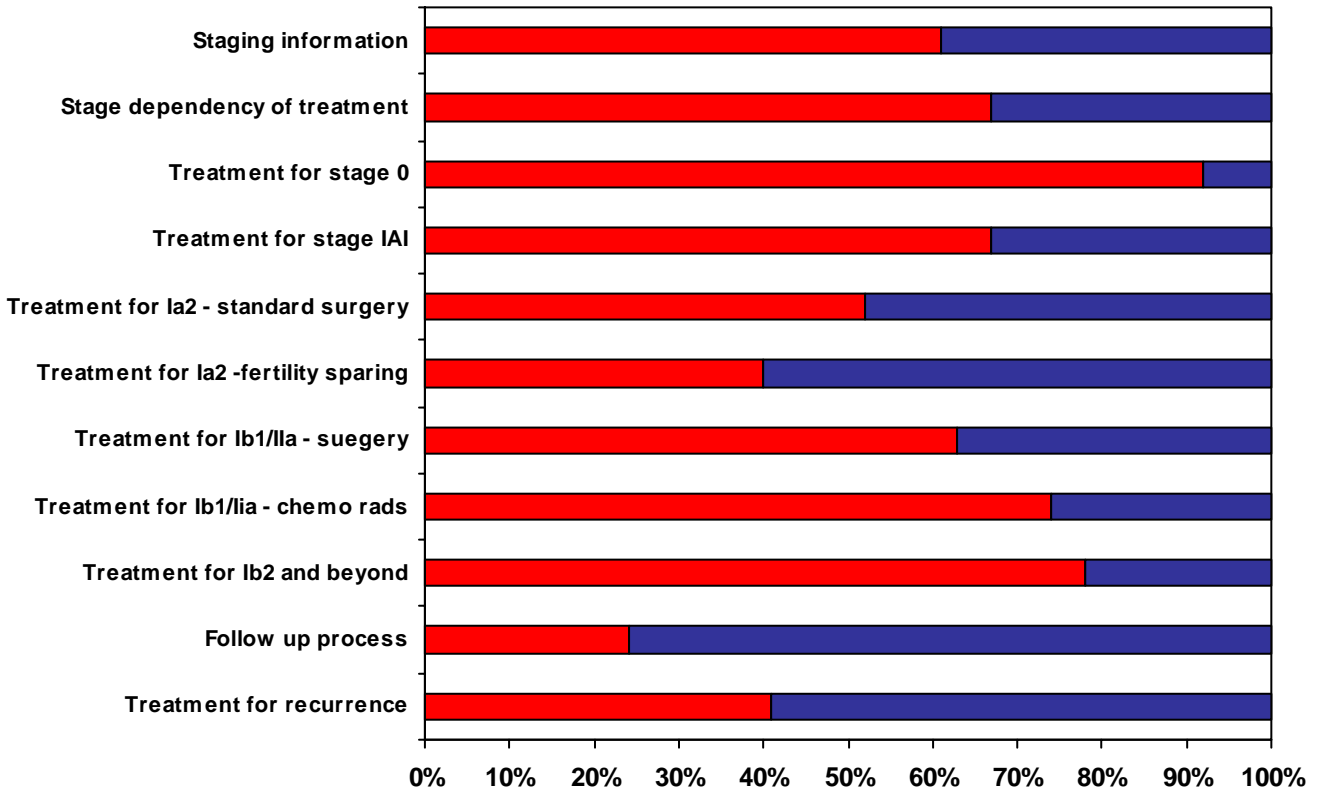

Supplement: MOESM2 [file 9519080]
